# Supplementary material for: Heat and pressure-resistant room temperature irreversible sealing of hybrid PDMS–thermoplastic microfluidic devices via carbon–nitrogen covalent bonding and its application in a continuous-flow polymerase chain reaction
Source: Royal Society of Chemistry journal article supplement (doi:10.1039/d0ra02332a), 2020-01-01
Supplement: d0ra02332a2.pdf [file d0ra02332a2.pdf]

## Electronic Supplementary Material (ESI)

### **Heat and pressure-resistant room temperature irreversible sealing of hybrid PDMS–thermoplastic microfluidic devices *via* carbon–nitrogen covalent bonding and its application for continuous-flow polymerase chain reaction**

Rajamanickam Sivakumar,<sup>a</sup> Kieu The Loan Trinh<sup>a</sup> and Nae Yoon Lee<sup>\*b</sup>

<sup>a</sup>Department of Industrial Environmental Engineering, College of Industrial Environmental Engineering, Gachon University, 1342 Seongnam-daero, Sujeong-gu, Seongnam-si, Gyeonggi-do, 13120, Korea

<sup>b</sup>Department of BioNano Technology, Gachon University, 1342 Seongnam-daero, Sujeong-gu, Seongnam-si, Gyeonggi-do, 13120, Korea

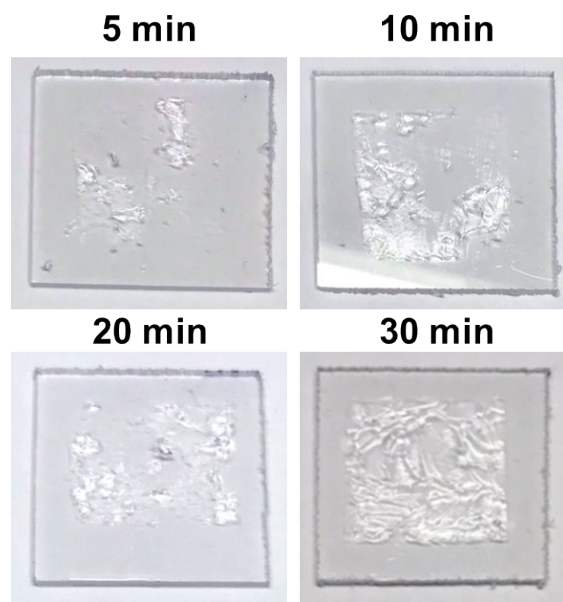

**Fig. S1** Photos showing the reaction progress between the ECTMS coated PDMS and APTES coated PC with the lapse of time.

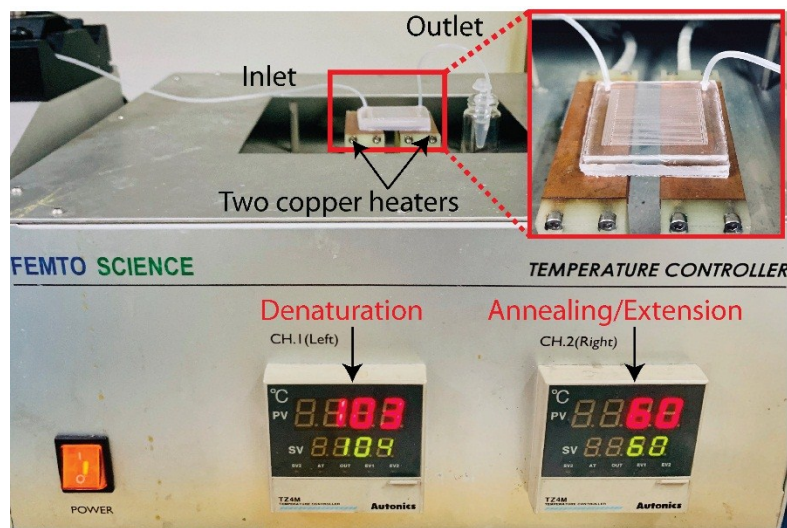

**Fig. S2** A photo of the temperature controller used for performing on-chip CF-PCR.

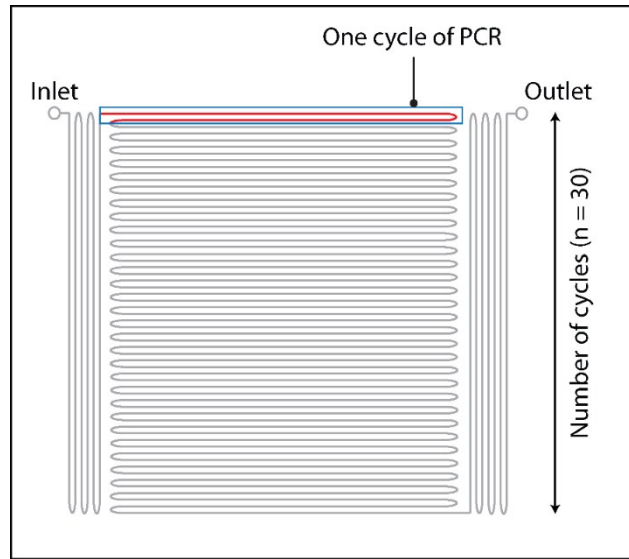

**Fig. S3** A schematic illustration of the serpentine microchannel of the PDMS–PC microfluidic device used for 30 thermal cycles for CF-PCR.

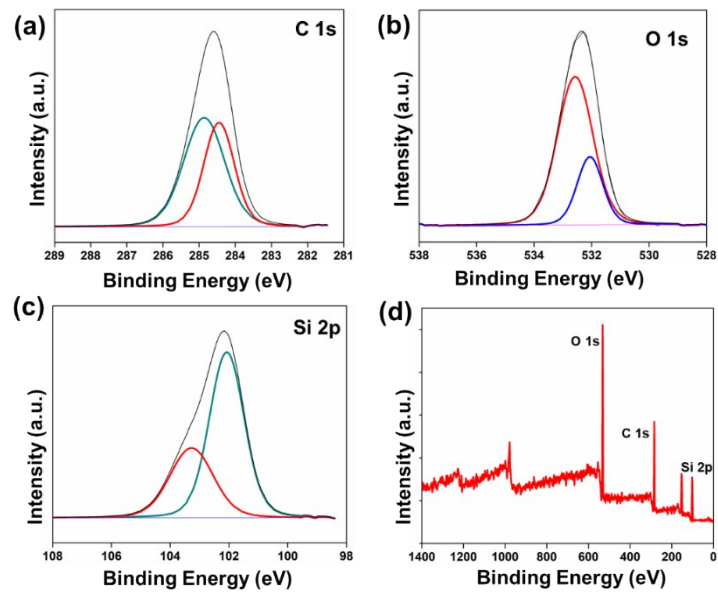

**Fig. S4** High resolution XPS spectra for PDMS. (a) C1s, (b) O1s, (c) Si2p and (d) survey spectrum.

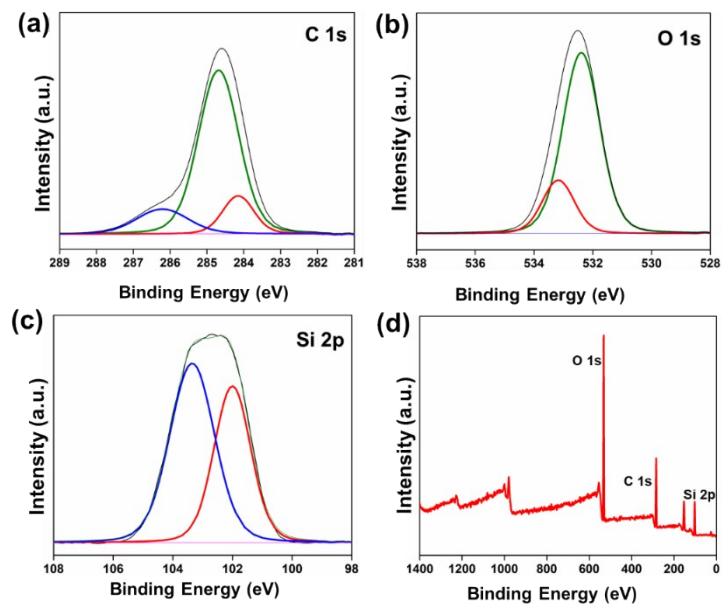

**Fig. S5** High resolution XPS spectra for ECTMS modified PDMS. (a) C1s, (b) O1s, (c) Si2p and (d) survey spectrum.

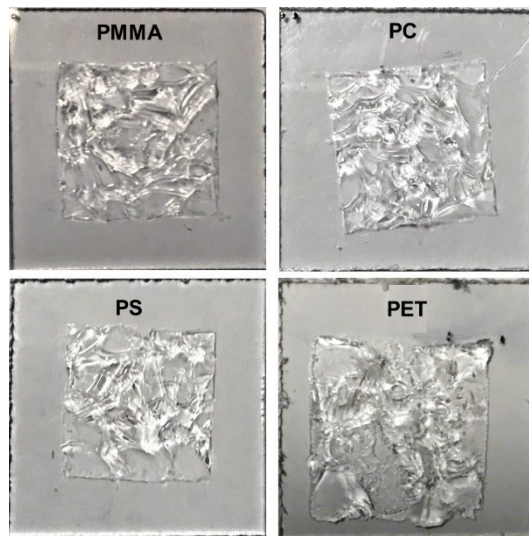

**Fig. S6** Results of delamination test.

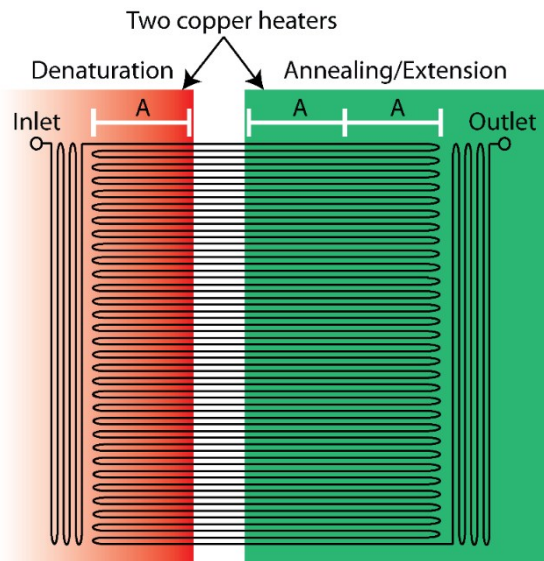

**Fig. S7** A schematic illustration of the PDMS-PC microfluidic device placed on two copper heaters for controlling the temperature for CF-PCR. Red and green colors represent denaturation and annealing/extension zones, respectively. “A” is a length value.

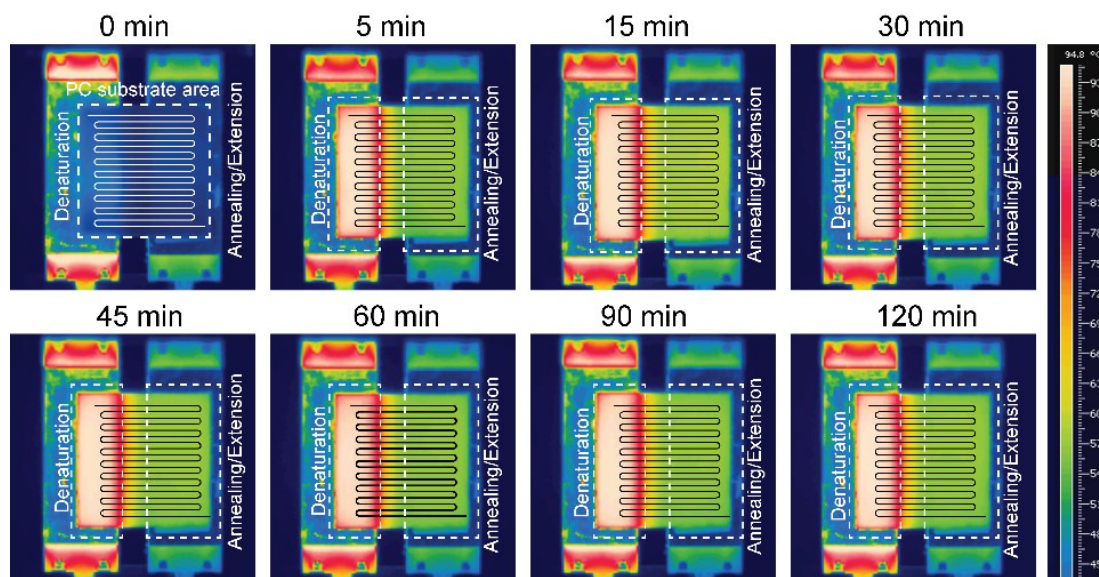

**Fig. S8** The IR camera images showing the time-dependent temperatures of the surface of the PC substrate at 0, 5, 15, 30, 45, 60, 90, and 120 min after applying the heat from two copper heat blocks.

**Table S1** Comparison of the bonding strengths

| Bonding substrates | Bonding strength (kPa) | Silane reagent        | Bonding time | Ref                                                  |
|--------------------|------------------------|-----------------------|--------------|------------------------------------------------------|
| PDMS–PMMA          | 274.5                  |                       |              |                                                      |
| PDMS–PS            | 591.7                  | 1 wt% APTMS and ECTMS | 30 min       | This work                                            |
| PDMS–PC            | 594.7                  |                       |              |                                                      |
| PDMS–PET           | 510.0                  |                       |              |                                                      |
| PDMS–PMMA          | 180                    | 1 wt% APTMS and GPTMS | 1 h          | <i>Lab Chip</i> , 2010, <b>10</b> , 1274–1280        |
| PDMS–PC            | 178                    |                       |              |                                                      |
| PDMS–PMMA          | 305.8                  | 5 wt% APTMS           | 15 min       | <i>Appl. Surf. Sci.</i> , 2015, <b>327</b> , 233–240 |
| PDMS–PC            | 219.7                  |                       |              |                                                      |
| PDMS–PET           | 189.0                  |                       |              |                                                      |
| PDMS–PS            | 475.7                  |                       |              |                                                      |
| PDMS–PC            | 430                    | 1 wt% APTMS           | 15 min       | <i>Lab Chip</i> , 2011, <b>11</b> , 962–965          |
| PDMS–COC           | 432                    |                       |              |                                                      |
| PDMS–PMMA          | 385                    |                       |              |                                                      |
| PDMS–PS            | 388                    |                       |              |                                                      |
